# Supplementary material for: Citation Accuracy: A Case Study on Definition of the Grey Water Footprint
Source: MDPI journal article supplement (doi:10.3390/publications11010008), 2023-02-16
Supplement: s1 [file s1]

# Citation Accuracy: A Case Study on Definition of the Grey Water Footprint

Libor Ansorge \* and Lada Stejskalová

T. G. Masaryk Water Research Institute, Podbabská 2582/30, 16000 Prague, Czech Republic, lada.stejskalova@vuv.cz

\* Correspondence: libor.ansorge@vuv.cz; Tel.: +420 220 197 285

**Table S1.** Who is cited references.

| Reference                                          | Reference—DOI/URL or source                                                                                                                                                                         | Def. GWF | Total |
|----------------------------------------------------|-----------------------------------------------------------------------------------------------------------------------------------------------------------------------------------------------------|----------|-------|
| Ababaei, Ramezani (2017)                           | 10.1016/j.agwat.2016.07.016                                                                                                                                                                         | Yes      | 1     |
| Cao et al. (2014)                                  | 10.3969/j.issn.1002-6819.2014.01.009                                                                                                                                                                | N/A      | 1     |
| Cazcarro et al. (2013)                             | 10.3390/su7055094                                                                                                                                                                                   | Yes      | 1     |
| Jefferies et al. (2012)                            | 10.1016/j.jclepro.2012.04.015                                                                                                                                                                       | Yes      | 1     |
| De Girolamo et al. (2019)                          | 10.1016/j.ecolind.2019.03.040                                                                                                                                                                       | Yes      | 1     |
| Dong et al. (2014)                                 | 10.1016/j.scitotenv.2014.08.094                                                                                                                                                                     | Yes      | 1     |
| Ercin et al. (2009)                                | <a href="https://waterfootprint.org/media/downloads/Report39-WaterFootprintCarbonatedBeverage_1.pdf">https://waterfootprint.org/media/downloads/Report39-WaterFootprintCarbonatedBeverage_1.pdf</a> | Yes      | 1     |
| Ercin et al. (2011)                                | <a href="https://waterfootprint.org/media/downloads/Report49-WaterFootprintSoy_1.pdf">https://waterfootprint.org/media/downloads/Report49-WaterFootprintSoy_1.pdf</a>                               | Yes      | 1     |
| Franke et al. (2013)                               | [24]                                                                                                                                                                                                | Yes      | 9     |
| Fu et al. (2017)                                   | ???                                                                                                                                                                                                 | N/A      | 1     |
| Haroon et al. (2021)                               | 10.1016/j.scitotenv.2021.145844                                                                                                                                                                     | Yes      | 1     |
| Hoekstra (2009)                                    | 10.1016/j.ecolecon.2008.06.021                                                                                                                                                                      | Yes      | 1     |
| Hoekstra (2016)                                    | 10.1016/j.ecolind.2016.02.026                                                                                                                                                                       | Yes      | 1     |
| Hoekstra et al. (2009)                             | <a href="https://ayhoekstra.nl/pubs/Hoekstra-et-al-2009-WaterFootprintManual.pdf">https://ayhoekstra.nl/pubs/Hoekstra-et-al-2009-WaterFootprintManual.pdf</a>                                       | Yes      | 8     |
| Hoesktra et al. (2011)                             | [23]                                                                                                                                                                                                | Yes      | 99    |
| Hoesktra et al. (2011)<br>(book review)            |                                                                                                                                                                                                     | Yes      | 2     |
| Hoesktra et al. (2011)/<br>Chapagain et al. (2006) | [23], [22]                                                                                                                                                                                          | Yes      | 5     |

| Reference                                | Reference – DOI/URL or source                                                                                                                                                                                                                                                                     | Def. GWF | Total |
|------------------------------------------|---------------------------------------------------------------------------------------------------------------------------------------------------------------------------------------------------------------------------------------------------------------------------------------------------|----------|-------|
| Hoekstra, Hung (2005)                    | 10.1016/j.gloenvcha.2004.06.004                                                                                                                                                                                                                                                                   | No       | 1     |
| Hoekstra, Chapagain (2007)               | 10.1007/978-1-4020-5591-1_3                                                                                                                                                                                                                                                                       | Yes      | 6     |
| Hoekstra, Chapagain (2008)               | 10.1002/9780470696224                                                                                                                                                                                                                                                                             | Yes      | 7     |
| Hoekstra, Chapagain (2011)               | [19]                                                                                                                                                                                                                                                                                              | Yes      | 1     |
| Hoekstra, Chapagain (2011) (book review) | [19]                                                                                                                                                                                                                                                                                              | Yes      | 1     |
| Hoekstra, Mekonnen (2011)                | 10.1073/pnas.110993610                                                                                                                                                                                                                                                                            | Yes      | 1     |
| Hoekstra, Mekonnen (2012)                | 10.1073/pnas.1109936109                                                                                                                                                                                                                                                                           | Yes      | 7     |
| Huang et al. (2019)                      | 10.1016/j.jhydrol.2019.04.046                                                                                                                                                                                                                                                                     | No       | 1     |
| Chapagain et al. (2006)                  | [22]                                                                                                                                                                                                                                                                                              | Yes      | 6     |
| Chapagain, Hoekstra (2003)               | <a href="https://waterfootprint.org/media/downloads/Report12_1.pdf">https://waterfootprint.org/media/downloads/Report12_1.pdf</a>                                                                                                                                                                 | No       | 1     |
| Chapagain, Hoekstra (2008)               | 10.1080/02508060801927812                                                                                                                                                                                                                                                                         | No       | 1     |
| Laspidou (2013)                          | <a href="https://www.researchgate.net/publication/269095803_Grey_water_footprint_of_crops_and_crop-derived_products_Analysis_of_calculation_method">https://www.researchgate.net/publication/269095803_Grey_water_footprint_of_crops_and_crop-derived_products_Analysis_of_calculation_method</a> | Yes      | 1     |
| Li et al. (2021)                         | 10.1016/j.resconrec.2020.105202                                                                                                                                                                                                                                                                   | Yes      | 1     |
| Liu et al. (2012)                        | 10.1016/j.ecolind.2011.10.005                                                                                                                                                                                                                                                                     | Yes      | 3     |
| Lovarelli et al. (2016)                  | 10.1016/j.scitotenv.2016.01.022                                                                                                                                                                                                                                                                   | Yes      | 2     |
| Martínez-Alcalá et al. (2018)            | 10.1016/j.watres.2018.02.033                                                                                                                                                                                                                                                                      | Yes      | 1     |
| Mekonnen, Hoekstra (2010a)               | 10.5194/hess-14-1259-2010                                                                                                                                                                                                                                                                         | Yes      | 2     |
| Mekonnen, Hoekstra (2010b)               | <a href="https://www.waterfootprint.org/media/downloads/Report47-WaterFootprint-Crops-Vol1.pdf">https://www.waterfootprint.org/media/downloads/Report47-WaterFootprint-Crops-Vol1.pdf</a>                                                                                                         | Yes      | 4     |
| Mekonnen, Hoekstra (2011)                | 10.5194/hess-15-1577-2011                                                                                                                                                                                                                                                                         | Yes      | 7     |
| Mekonnen, Hoekstra (2014)                | 10.1016/J.ECOLIND.2014.06.013                                                                                                                                                                                                                                                                     | Yes      | 1     |
| Mekonnen, Hoekstra (2015)                | 10.1021/acs.est.5b03191                                                                                                                                                                                                                                                                           | Yes      | 1     |
| Mekonnen, Hoekstra (2018)                | 10.1002/2017WR020448                                                                                                                                                                                                                                                                              | Yes      | 1     |
| Miglietta et al. (2017)                  | 10.3390/su9050799                                                                                                                                                                                                                                                                                 | Yes      | 2     |
| Morera et al. (2016)                     | 10.1016/j.jclepro.2015.05.102                                                                                                                                                                                                                                                                     | Yes      | 1     |
| Pahlow et al. (2015)                     | 10.1016/j.scitotenv.2015.07.124                                                                                                                                                                                                                                                                   | Yes      | 1     |
| Pfister et al. (2017)                    | 10.1016/j.ecolind.2016.07.051                                                                                                                                                                                                                                                                     | No       | 1     |
| Ridout, Pfister (2010)                   | 10.1016/j.gloenvcha.2009.08.003                                                                                                                                                                                                                                                                   | Yes      | 1     |
| WFN                                      | <a href="https://waterfootprint.org/en/water-footprint/what-is-water-footprint/">https://waterfootprint.org/en/water-footprint/what-is-water-footprint/</a>                                                                                                                                       | Yes      | 1     |
| Wu et al. (2012)                         | 10.1029/2011WR011809                                                                                                                                                                                                                                                                              | Yes      | 2     |
| Zeng et al. (2013)                       | 10.1016/j.ecolind.2013.06.012                                                                                                                                                                                                                                                                     | Yes      | 1     |

| Reference           | Reference—DOI/URL or source    | Def.<br>GWF | Total      |
|---------------------|--------------------------------|-------------|------------|
| Zhang et al. (2011) | 10.1016/j.ecolecon.2011.08.011 | Yes         | 1          |
| <b>Total</b>        |                                |             | <b>203</b> |

## References

19. Hoekstra, A.Y.; Hung, P.Q. *Virtual Water Trade—A Quantification of Virtual Water Flows between Nations in Relation to International Crop Trade*; Value of Water Research Report Series; UNESCO-IHE Institute for Water Education: Delft, The Netherlands, 2002; p. 120.
21. Hoekstra, A.Y.; Chapagain, A.K. *Globalization of Water: Sharing the Planet's Freshwater Resources*; Blackwell Pub: Malden, MA, USA, 2008; ISBN 978-1-4051-6335-4.
22. Hoekstra, A.Y.; Chapagain, A.K. The Water Footprints of Morocco and the Netherlands: Global Water Use as a Result of Domestic Consumption of Agricultural Commodities. *Ecol. Econ.* **2007**, *64*, 143–151. <https://doi.org/10.1016/j.ecolecon.2007.02.023>.
23. Chapagain, A.K.; Hoekstra, A.Y.; Savenije, H.H.G.; Gautam, R. *The Water Footprint of Cotton Consumption*; Value of Water Research Report Series; UNESCO-IHE Institute for Water Education: Delft, The Netherlands, 2005.
24. Chapagain, A.K.; Hoekstra, A.Y.; Savenije, H.H.G.; Gautam, R. The Water Footprint of Cotton Consumption: An Assessment of the Impact of Worldwide Consumption of Cotton Products on the Water Resources in the Cotton Producing Countries. *Ecol. Econ.* **2006**, *60*, 186–203. <https://doi.org/10.1016/j.ecolecon.2005.11.027>.
